1 Repeated exposure to nanosecond high power pulsed microwaves increases cancer  
2 incidence in rat

3 René de Seze<sup>1\*</sup>, Carole Poutriquet<sup>2</sup>, Christelle Gamez<sup>1</sup>, Emmanuelle Maillot-Maréchal<sup>1</sup>, Franck  
4 Robidel<sup>1</sup>, Anthony Lecomte<sup>1</sup>, Caroline Fonta<sup>2</sup>

5 <sup>1</sup>PeriTox/Experimental Toxicology Unit UMR-I 01, Chronic Risks Division, Institut National de  
6 l'Environnement Industriel et des Risques, Verneuil en Halatte, France. <sup>2</sup>Centre de Recherche  
7 Cerveau et Cognition, Centre National de la Recherche Scientifique UMR5549, Université de  
8 Toulouse, Toulouse, France.

9 \*Corresponding author

10 E-mail: [rene.de-seze@ineris.fr](mailto:rene.de-seze@ineris.fr) (RdS)

## 1     **Abstract**

2     High-power microwaves are used to inhibit electronics of threatening military or civilian vehicles.

3     This work aims to assess health hazards of high-power microwaves and helps define hazard  
4     threshold levels of modulated radiofrequency exposures such as those emitted by the first  
5     generations of mobile phones.

6     Rats were exposed to the highest possible field levels, under single acute or repetitive exposures  
7     for eight weeks. Intense microwave electric fields at 1 MV/m of nanoseconds duration were  
8     applied from two sources at different carrier frequencies of 10 and 3.7 GHz. The repetition rate  
9     was 100 pps, and the duration of train pulses lasted from 10 s to twice 8 min. The effects were  
10    studied on the central nervous system, by labelling brain inflammation marker GFAP and by  
11    performing different behavioural tests: rotarod, T-maze, beam-walking, open-field, and avoidance  
12    test. Long-time survival was measured in animals repeatedly exposed, and anatomopathological  
13    analysis was performed on animals sacrificed at two years of life or at death if earlier. One group  
14    was sham exposed.

15    Few effects were observed on behaviour. With acute exposure, an avoidance reflex was shown at  
16    very high, thermal level (22 W/kg); GFAP was increased some days after exposure. Most  
17    importantly, with repeated exposures, survival time was 4-month shorter in the exposed group,  
18    with eleven animals exhibiting a large sub-cutaneous tumour, compared to two in the sham group.

19    A residual X-ray exposure was also present in the beam (0.8 Gy), which is not a bias for the  
20    observed result.

21 High power microwaves below thermal level in average, can increase cancer incidence and  
22 decrease survival time in rats, without clear effects on behaviour. The parameters of this effect  
23 need to be explored further, and a more precise dosimetry to be performed.

## 24 **Introduction**

25 High power microwaves (HPM) are used to inhibit the electronic systems of threatening vehicles.  
26 Concern has arisen as to whether HPM could lead to health hazards for operators of emitting  
27 systems and for personnel exposed in targeted vehicles. The health effects of HPM have been  
28 studied since the discovery of radar in the middle of the past century. Many experiments have been  
29 performed with microsecond pulses at levels of several hundred kilovolts per meter. Some studies  
30 have been published, but many others have been presented only as reports or at scientific meetings.  
31 Studies performed with a specific absorption rate (SAR) above the thermal threshold of  $4 \text{ W kg}^{-1}$   
32 have shown biological effects. Below  $4 \text{ W kg}^{-1}$ , for studies showing effects, the pulse duration of  
33 single pulses was between 40 ns and 10  $\mu\text{s}$ , and peak-SAR was from 5 to 20  $\text{MW kg}^{-1}$ . Half of the  
34 studies on HPM addressed behavioral endpoints, reviewed by D'Andrea [1]. Others bear on the  
35 cardio-vascular [2,3], visual [4], and auditory systems [5]. Only sparse work concerned blood-  
36 brain-barrier permeability [6,7], DNA damage [8,9], carcinogenesis [10-12], or cellular or sub-  
37 cellular mechanisms [13]. Concerning cancer, Zhang [14] and Devyatkov et al. [10] reported  
38 protective effects at levels above thermal threshold, with smaller tumors and a 30% increase of  
39 survival rate in exposed animals. Several years after Seaman' article [15], a recent review by  
40 Schunck reported only one new paper in 2009, and no other effects on cancer were reported [16].  
41 However, durations of exposure in those studies were often short.

42 Using a realistic source of HPM, this study looked for whether the highest possible exposure levels  
43 could produce behavioural or functional effects in rats acutely exposed, or chronic pathological  
44 effects with a repetitive exposure for two months. We assessed effects of 3.7 and 10 GHz  
45 nanosecond pulsed HPM around 1 MV/m on the health and lifespan of male Sprague-Dawley rats.

## 46 **Methods**

### 47 **Literature survey**

48 We looked at the scientific and medical literature (NCBI-PubMed, Current Contents and Science  
49 Direct, more recently Web of Science) and at specialized databases of papers, scientific meetings  
50 and reports (EMF Database, IEEE ICES EMF Literature Database and WHO- EMF-Portal). The  
51 following keywords were used: HPM, high power microwave, high peak, electromagnetic pulse,  
52 microwave radiation, high exposure microwave, HPPP, EHPP, high intensity microwave.

### 53 **Exposure systems**

54 The sources of high-power microwaves (HPM) were two superradiance generators, one in X-band  
55 at 10 GHz (SRX) with pulses of 1 ns, the other in S-band at 3.7 GHz (SRS) with pulses of 2.5 ns.  
56 The strongest possible microwave electric fields were applied, of about 1 MV m<sup>-1</sup>, at a repetition  
57 rate of 100 pps (Table 1). The “SINUS type” electron accelerator of this system is made of a Tesla  
58 generator and a continuous formation line. A great advantage of this system is its small size. The  
59 superradiance source is derived from the back-wave oscillator, with the following characteristic  
60 features: ultrashort microwave pulses, and very high peak power.

61 **Table 1. Exposure parameters of the two exposure sources.**

62

|                                        | <b>SRX</b>              | <b>SRS<br/>acute</b>   | <b>SRS<br/>avoidance</b> | <b>SRS<br/>repeated</b>  |
|----------------------------------------|-------------------------|------------------------|--------------------------|--------------------------|
| <b>Beam diameter at output</b>         | 13 cm                   | 22 cm                  |                          |                          |
| <b>Frequency</b>                       | 10 GHz                  | 3.7 GHz                |                          |                          |
| <b>Total emitting power</b>            | 350 MW                  | 500 MW                 |                          |                          |
| <b>Pulse duration</b>                  | 1 ns                    | 2.5 ns                 |                          |                          |
| <b>Train duration</b>                  | 10 s                    | Continuous             |                          |                          |
| <b>Emission duration</b>               | Every 5 min for<br>1 h  | 2 x 8 min              | 14 min                   | 2 x 8 min                |
| <b>Peak surface power at output</b>    | 20 GW m <sup>-2</sup>   | 2 GW m <sup>-2</sup>   |                          |                          |
| <b>Distance from the horn</b>          |                         | 0.60 m                 | 0.13 m                   | 3.0 m                    |
| <b>Peak E-field</b>                    | 3 MV m <sup>-1</sup>    | 1.7 MV m <sup>-1</sup> | 2.9 MV m <sup>-1</sup>   | 0.56 MV m <sup>-1</sup>  |
| <b>Peak SAR</b>                        | 95 MW kg <sup>-1</sup>  | 31 MW kg <sup>-1</sup> | 90 MW kg <sup>-1</sup>   | 3.33 MW kg <sup>-1</sup> |
| <b>Average SAR over total exposure</b> | 0.34 W kg <sup>-1</sup> | 4.7 W kg <sup>-1</sup> | 22 W kg <sup>-1</sup>    | 0.83 W kg <sup>-1</sup>  |

## 64 **Animals**

65 Six-weeks-old Sprague Dawley male rats were purchased from Charles River, L'Arbresle, France.  
66 They were either exposed or sham-exposed. The protocol was reviewed and approved by INERIS  
67 ethical committee. Animals were monitored clinically and for mortality once a day. Closer  
68 surveillance was performed in case of clinical observations, such as behaviour changes, dull hair  
69 or upon appearance of a tumor. After a repeated exposure, the criteria to determine when animals  
70 should be ethically euthanized during the follow-up were: weight loss (more than 20% as  
71 compared to the week before), ulceration of a tumor, tumor size larger than 8 cm, impaired  
72 movement, loss of spontaneous activity or loss of reactions to stimulus.

## 73 **Exposure protocol**

74 Two types of acute exposures were carried out. The SRX exposure lasted 10 s every 5 min for one  
75 hour, and the SRS exposure lasted 2 x 8 min with 10 min interval (26 min total). For acute  
76 exposures, rats were exposed one by one directly at the horn output (168 animals in total, 12 per  
77 group). Besides, one protocol of repeated exposures was used with SRS source. The 26 minutes-  
78 exposure was repeated each day, 5 days/week for 8 weeks. When performing mean term repetitive  
79 exposures every day with a realistic source that cannot easily be duplicated, there is a need for  
80 optimization of the design to expose many animals at the same time. The circular beam produced  
81 by the TM01 mode of the waves was adapted to this goal, with a beam width large enough to  
82 simultaneously expose 12 animals at 2.5 m from the SRS output. Animals were exposed 2 by cage  
83 in six cages placed each day at different positions on the circle. Then every day, 2 series of 12  
84 animals were exposed, alternating with 2 series of sham exposure in-between to allow time for the

85 equipment to cool down between two successive exposure sessions. In total, two groups of 24 rats  
 86 received a repeated exposure, either real, either sham (Table 2).

87 **Table 2. Global design of the study.**

88

|                               | <b>SRX</b>                                                                                                         | <b>SRS</b>                                                   |                                                                                           |
|-------------------------------|--------------------------------------------------------------------------------------------------------------------|--------------------------------------------------------------|-------------------------------------------------------------------------------------------|
| <b>Exposure</b>               | <b>acute</b>                                                                                                       | <b>acute</b>                                                 | <b>repeated</b>                                                                           |
| <b>Emission duration</b>      | 10 s every 5 min for 1 h                                                                                           | 2 x 8 min with 10mn interval<br>Avoidance: 14 min continuous | 2 x 8 min with 10 mn interval<br>5 days/week for 8 weeks                                  |
| <b>Age at experiment</b>      | 6 weeks                                                                                                            | 6 weeks                                                      | 6 weeks                                                                                   |
| <b>Nb animals /exposition</b> | 1                                                                                                                  | 1                                                            | 12                                                                                        |
| <b>Behavioural tests</b>      | Beam walking (n=13/11 <sup>a</sup> ), rotarod (n=12/12), T-maze (13/11), open field (n=12/12), avoidance (n=11/10) | Beam walking, rotarod, T-maze, avoidance (n=12/12)           | T-maze (n=8/8, wk14 <sup>b</sup> ), Beam walking (n=12/12, wk15), rotarod (n=24/24, wk16) |



|                                                                                    |                                |                       |                       |
|------------------------------------------------------------------------------------|--------------------------------|-----------------------|-----------------------|
| <b>GFAP staining</b><br><b>(J=exposition</b><br><b>day</b><br><b>n=nb animals)</b> | J+2 n=12/12<br><br>J+7 n=11/11 | J+2 n=12/12           |                       |
| <b>Anatomo-</b><br><b>pathology</b><br><b>(HES)</b>                                | 104 weeks or at death          | 104 weeks or at death | 104 weeks or at death |
| <b>Lifespan</b><br><b>recording</b><br><b>(up to 2 years)</b>                      |                                |                       | n=24/24               |

89  
90 <sup>a</sup>n=n1/n2=[number of exposed animals] / [number of sham animals].  
91 <sup>b</sup>Wk = age of animals at the date of test.

92

93 After the end of repeated exposure, the animals were observed and followed up to 2 years of age.

94 Lifespan was recorded, and anatomo-pathological examination was performed at the animal death.

95 For each test, a group of 12 exposed animals was compared to a similar-sized group of sham-

96 exposed animals, put in the same place and under the same ambient conditions than the exposed

97 animals, but without emission from the source.

## 98 **Investigations on the central nervous system**

99 After one acute or the last repetitive exposure, different behavioural tests were performed: beam-  
100 walking, rotarod, T-maze, open-field. An avoidance test was also performed during an acute SRS  
101 exposure, applied continuously for 14 minutes (Table 2). In the avoidance test, animals can choose  
102 to spend time in two parts of a box. One part is protected against the beam (shielded), the other is  
103 not. The time spent in the non-protected side is recorded.

104 After the behavioural tests were performed, animals were sacrificed, and an immunohisto-  
105 chemical labelling of the brain inflammation marker GFAP was achieved on 40  $\mu\text{m}$  thick slices  
106 for 5 areas of the brain: frontal cortex, gyrus dentate, putamen, pallidum and cerebellar cortex, 2  
107 days after the SRX and the SRS exposures, and 7 days after the SRX exposure. (Table 2).

108 The global design of this study and the sample size in each test are summarized in Table 2.

## 109 **Anatomopathology**

110 After the end of repeated exposures, the animals were followed up to 2 years of age. For animals  
111 needing an ethical sacrifice, the lifespan was recorded. Either at this time or at 104 weeks, animals  
112 were sacrificed with a lethal overdose of pentobarbital (5.0 ml kg<sup>-1</sup> IP), organs were collected and  
113 fixed in 4% isotone buffered formalin for 48 to 72h. Organs larger than 5 mm were cut for an  
114 optimized fixation and all tissue samples were included in paraffine blocks.

115 Five  $\mu\text{m}$  slices were cut with a microtome and 6 slides per organ were prepared. An anatomo-  
116 pathological examination was performed on two slices per organ. One slide was coloured with  
117 haematoxylin-eosin stain (HES), the second was stored in case of need for any other specific  
118 labelling.

## 119 **Dosimetry**

120 Electric field has been measured at the actual exposure distance of 2.2 m from the source output  
121 with a germanium detector and calculated for closer distances. As numerical computation of  
122 specific absorption rate (SAR) by FDTD has not been available, the whole-body specific  
123 absorption rates (SAR) (defined as electromagnetic power absorbed per unit of tissue mass) were  
124 calculated for each condition from the rat's position and size as described by Gandhi [17] and  
125 Durney et al. [18]. Time-averaged SARs were 0.8 W kg<sup>-1</sup> for the repeated exposure, and between  
126 0.34 and 22 W kg<sup>-1</sup> for acute exposures. Peak SARs during the pulses were between 3.3 and 95  
127 MW kg<sup>-1</sup> (Table 1). Some residual X-rays came out from the device, for 20 mGy/day (total 0.8  
128 Gy). Numerical and experimental dosimetry and thermometry need to be performed to reinforce  
129 the results of this study.

## 130 **Statistics**

131 Percentages of time spent in the exposed or in the blinded box were compared by two-way  
132 ANOVA with two factors: exposure (exposed or sham) and period (habituation or exposure).  
133 Percentages of labelled areas for GFAP were compared by two-way ANOVA with two factors:  
134 exposure (exposed or sham) and localisation (brain area). Survival rates of repetitively exposed  
135 animals were compared with Prism 5 v5.02 by the log-rank test (Mantel-Cox), with calculation of  
136 two-tail p value, of the median survival and of the hazard ratio between both groups by the Mantel-  
137 Haenszel method.

## 138 **Results**

### 139 **Behavioural tests**

140 First, behavioural tests to evaluate cognitive and sensori-motor functions were performed. No  
141 effects were observed after acute or repetitive exposures on behavioural results in beam-walking,  
142 T-maze and open-field tests. After repeated exposure to a superradiance S source (SRS) of HPM,  
143 rotarod performance was assessed: rats had to stay for three minutes on an axis rotating at 16 turns  
144 per minute. They underwent one training session and one test session. In the test session, rotarod  
145 performance was significantly enhanced in exposed animals: 41/72 exposed animals succeeded,  
146 compared to 23/72 sham animals -  $p < 0.001$ . Also, during an acute SRS exposure, with a choice  
147 for rats to stay in an exposed or a shielded compartment (avoidance reflex), exposed animals spent  
148 3.7% of time on the exposed side, compared to 21.9% for the sham group –  $p < 0.001$ .

## 149 **Brain inflammation**

150 Then, brain inflammation was assessed by measuring glial fibrillary acidic protein (GFAP) levels,  
151 indicative of damaged or dysfunctional cerebral tissue. With a superradiance X source (SRX) of  
152 HPM, expression of GFAP was not increased two days (D2), but was increased seven days (D7),  
153 after an acute exposure, in all brain areas, except the cerebellum cortex (+50.0% -  $p < 0.02$ ). With  
154 SRS, GFAP expression was increased two days after acute exposure (D2 - +115% -  $p < 0.001$ )  
155 (Fig 1).

156 **Fig 1. GFAP expression after repeated exposure to SRS source.** GFAP immunohistochemical  
157 labelling in different brain areas two days after exposure with Superradiance S source (% labelled  
158 area - Mean  $\pm$  SEM). White = sham (n=12); black = exposed (n=12). One slice per area per animal.

159 \*\*\*  $p < 0.001$

## 160 **Lifespan**

161 Most strikingly, six exposed animals deceased early between 33 and 47 weeks, leading to a 4-  
162 months decrease of lifespan in the repetitively exposed group (n=24) compared to the sham group  
163 (n=24) (Fig 2). The median lifespan was 590 days for the exposed group, compared to 722 days  
164 for the sham group –  $p < 0.0001$ . One sham rat was used as sentinel for sanitary control, eleven  
165 sham animals survived at the end of the experiment, whereas only two animals survived in the  
166 exposed group. The hazard ratio was 4.1 [CI = 2.0-8.6].

167 **Fig 2. Survival proportion of rats after repeated daily exposure.** Empty circles = sham; black  
168 circles = exposed. Survival curves were significantly different ( $p < 0.001$ ).

## 169 **Lethal tumours and anatomopathology**

170 For tumours identified as the cause of death, eleven of the exposed animals showed one or two  
171 large sub-cutaneous tumours of different types (five were malignant – seven appeared before 20  
172 months) (Table 3 and e.g. Fig 3), compared to only two such tumours in the sham group (both  
173 malignant, first one at 22 months).

174 **Table 3. Lifespan to death or sacrifice and anatomopathological diagnostic of lesions.**

175

| Rat # | Age at death (weeks) | Exposed group                       | Sham group |
|-------|----------------------|-------------------------------------|------------|
| 4     | 33                   | Internal mass, adenopathies ...     |            |
| 10    | 38                   | Fibrosarcoma                        |            |
| 21    | 39                   | Internal mass, adenopathies, spleen |            |
| 8     | 43                   | Fibrosarcoma                        |            |
| 20    | 45                   | Fibroma, ulcerated                  |            |
| 5     | 47                   | Posterior limbs paralysed           |            |
| 36    | 60                   |                                     | /a         |
| 3     | 66                   | Internal mass, spleen, pancreas     |            |

|    |     |                                                                                                                                                                         |                                                                                   |
|----|-----|-------------------------------------------------------------------------------------------------------------------------------------------------------------------------|-----------------------------------------------------------------------------------|
| 6  | 66  | Subcutaneous adenocarcinoma                                                                                                                                             |                                                                                   |
| 27 | 73  |                                                                                                                                                                         | Large cystic kidneys                                                              |
| 23 | 79  | Fibroma, ulcerated                                                                                                                                                      |                                                                                   |
| 17 | 82  | /                                                                                                                                                                       |                                                                                   |
| 37 | 83  |                                                                                                                                                                         | /                                                                                 |
| 25 | 84  |                                                                                                                                                                         | Posterior limbs paralysed                                                         |
| 46 | 84  |                                                                                                                                                                         | /                                                                                 |
| 2  | 84  | Pituitary tumour                                                                                                                                                        |                                                                                   |
| 11 | 84  | Spongy/granulous kidneys                                                                                                                                                |                                                                                   |
| 19 | 85  | <i>Mesenteric mass<sup>b</sup></i> , ileon (lysed organs)                                                                                                               |                                                                                   |
| 45 | 86  |                                                                                                                                                                         | Large preputial glands                                                            |
| 34 | 88  |                                                                                                                                                                         | Sentinel animal                                                                   |
| 24 | 88  | Polycystic kidneys                                                                                                                                                      |                                                                                   |
| 7  | 88  | Osteosarcoma                                                                                                                                                            |                                                                                   |
| 16 | 88  | <b>Fibro-epithelial polype<sup>c</sup></b> , cystic and spongy kidneys                                                                                                  |                                                                                   |
| 14 | 91  | Jejunal mass                                                                                                                                                            |                                                                                   |
| 9  | 92  | Mass: adrenal/kidney/spleen (internal bleeding)                                                                                                                         |                                                                                   |
| 48 | 92  |                                                                                                                                                                         | Large preputial glands                                                            |
| 13 | 94  | <b>Zymbal's gland adenoma</b> , ulcerated ear area, <i>pituitary tumour</i> , cystic and spongy kidneys                                                                 |                                                                                   |
| 1  | 94  | <b>Fibro-adenoma</b> , cystic and spongy kidneys, tracheo-bronchial ganglions large and inflammatrory                                                                   |                                                                                   |
| 15 | 95  | /                                                                                                                                                                       |                                                                                   |
| 29 | 97  |                                                                                                                                                                         | Large cystic and spongy kidneys, <i>white lung masses</i>                         |
| 35 | 98  |                                                                                                                                                                         | Cystic and spongy kidneys, duodenum dark and spongy content                       |
| 26 | 98  |                                                                                                                                                                         | <b>Subcutaneous schwannoma</b> , <i>large spleen</i> , large left preputial gland |
| 40 | 99  |                                                                                                                                                                         | /                                                                                 |
| 12 | 99  | <b>Fibrosarcoma</b><br>Dark abdominal cavity, testes soft small and dark. Soft brain, small spleen, <i>large left adrenal gland</i> , external part of lungs grey/brown |                                                                                   |
| 18 | 103 | /                                                                                                                                                                       |                                                                                   |

|           |      |               |              |
|-----------|------|---------------|--------------|
| 22        | 103  | Fibro-adenoma |              |
| 39        | 104  |               | Fibrosarcoma |
| 28, 30-33 | 103- |               | Sacrificed,  |
| 41-44, 47 | 104  |               | no tumor     |

176 Left column: exposed group (#=1-24); right column: sham group (#=25-48). <sup>a</sup>/: no macroscopic  
177 abnormality; <sup>b</sup>*italic*: internal masses found at death or at 24 months; <sup>c</sup>**bold**: large external masses  
178 leading to ethical sacrifice. Only two exposed rats survived at the end of the experiment at 103  
179 weeks. Eleven rats of the sham group survived to the end of the experiment: #28, 30-33, 38, 41-  
180 44 and 47 were sacrificed at 103 or 104 weeks without any tumor.

181 **Fig 3. (a) Picture of one exposed rat with two fibromas (left) – (b) macroscopic view of the**  
182 **femoral tumor (right).** The two fibromas were in the axillary and the femoral area, the  
183 macroscopic view was taken at autopsy (death at 18.5 months).

184 One of the exposed animals with an external tumour also had a pituitary tumour, and at death, six  
185 other exposed animals had abdominal masses and one had a pituitary tumour. Tumour types and  
186 lifespan are detailed in Table 3.

## 187 Discussion

188 Although they are hugely far above environmental levels, the question has been raised whether  
189 intense and very short pulses (nanosecond range) could have health effects. Old studies considered  
190 typical radar modulation of 1/1000<sup>th</sup> (1  $\mu$ s every ms, i.e. repetition rate of 1 kHz). Below the  
191 thermal level of 4W/kg, no specific effect of modulation had been proven, so this modulation  
192 factor of 1/1000<sup>th</sup> has been considered as safe in the public health standards [19]. Recent studies  
193 on high intensity nanosecond pulsed microwaves have been performed on cells and their  
194 electrophysiological properties, or on membrane permeability, but none on animals with repeated  
195 exposures [16].

## 196 Behavioural tests

197 No effect was seen in learning experiments, but a positive effect was found in the rotarod test,  
198 which mainly addresses a sensori-motor activity. This could be due to a slight heating at the SAR  
199 of  $4.7 \text{ W kg}^{-1}$  of the SRS source. Such a heating effect has been hypothesized by Preece who  
200 observed an increased reactivity (shorter reaction time) in human volunteers exposed to mobile  
201 phones at a SAR of  $1.7 \text{ W kg}^{-1}$  [20]. Avoidance of the SRS beam was significant in exposed  
202 animals subjected to a thermal SAR of  $22 \text{ W kg}^{-1}$ , which is high above the thermal threshold of  
203  $4 \text{ W kg}^{-1}$  identified by ICNIRP [19]. This expected result actually confirms the relevance of this  
204 threshold.

## 205 **Brain inflammation**

206 The larger GFAP increase in brain with SRS reflects the higher average SAR of  $4.7 \text{ W kg}^{-1}$  allowed  
207 by a continuous emission of SRS pulses instead of spaced 10 s pulses with average SAR of  $0.34 \text{ W}$   
208  $\text{kg}^{-1}$  in the SRX. These results are consistent with those previously found with a much lighter  
209 modulation of microwaves  $1/8^{\text{th}}$  of the time, such as the one produced by GSM mobile phones  
210 [21]. In comparison, the modulation of HPM is 1 ns at 100 pps, i.e. a ratio of  $10^{-7}$ . Alterations in  
211 the glial cell marker GFAP could represent a marker of a long-term risk in rats, but this has yet not  
212 been shown. Mainly known as a marker of traumatic injury, GFAP has been considered by  
213 previous studies as non-specific, therefore compromising its prognostic power [22].

## 214 **Lifespan, lethal tumours and anatomopathology**

215 More importantly, an increased and early rate of sarcomas and fibrosarcomas and higher associated  
216 mortality were observed in animals exposed to repetitive sessions at an average SAR of  $0.8 \text{ W}$   
217  $\text{kg}^{-1}$ , five times below the thermal threshold (Table 1). The spontaneous rate of fibrosarcomas



218 found in old Sprague Dawley rats at termination of two-year studies is usually around 1 to 3%,  
219 and tumours are rarely reported as cause of life shortening [23]. Several studies have tested the  
220 impact of HPM, but chronic exposure was only performed with continuous waves, radar-type  
221 microwave pulses of the order of microseconds [11,24,25], or mobile phone-type exposures [26].  
222 Effects on cancer and lifespan were reported with SARs close to or above the thermal level  
223 [24,27,28]. Only Chou et al reported an increase in primary malignancies, without life shortening,  
224 with pulsed waves at low SAR levels ( $0.15\text{-}0.4\text{ W kg}^{-1}$ ) and exposures lasting 21.5 h/day for 25  
225 months [25]. Recently, a NIEHS study of the National Toxicological Program reported an  
226 increased incidence of heart schwannoma and glioma in whole-body exposed rats to phone-type  
227 microwaves at much higher SARs than those used in humans [26]. Although experiments with  
228 newer extremely short pulses (a few ns long) have been performed, HPM had only been used in  
229 acute experiments, and most studies reporting an effect looked at physiological reactions, without  
230 addressing genotoxicity or carcinogenicity endpoints. This work therefore corresponds to the first  
231 report with in vivo exposure to extremely short duration peak pulses, with a high repetition rate,  
232 and with a design of repeated exposure for eight weeks.

233 Tinkey showed that very high doses of X-rays ( $> 46\text{ Gy}$ ) were needed to induce sarcomas in  
234 Sprague-Dawley rats [29]. then the low  $0.8\text{ Gy}$  residual X-ray level of this study cannot explain  
235 the observed early tumour increase. Therefore, this study shows that the observed tumours and  
236 decreased lifespans were due to repeated exposures at a SAR below the known health threshold of  
237  $4\text{ W kg}^{-1}$  (given that the peak SAR was of the order of  $3.3\text{ MW kg}^{-1}$ ; E-field above  $0.5\text{ MV m}^{-1}$ ).

238 Conversely, some studies would support a protective effect of HPM against cancer. Devyatkov  
239 found a decrease in cell proliferation in vitro and an increase in survival time of rats implanted

240 with a liver carcinosarcoma and exposed to 10 ns pulses at 9 GHz, which paradoxically was  
241 beneficial [10]. The peak power was 100 MW, but the electric field or SAR was not specified.  
242 More recently, after 16 – 1000 ns ultra-wide band pulses (UWB) with a frequency of 0.6 – 1.0  
243 GHz, a duration of 4 – 25 nanosecond, an amplitude of 0.1 – 36 kV cm<sup>-1</sup>, and a pulse repetition  
244 rate of 13 pulses per second (pps), Zharkova also found an inhibition of mitochondrial activity  
245 which has been interpreted rather as an anti-tumoral activity [30].

246 Other studies bring some mechanistic explanation that would support a cancerogenic effect.  
247 Dorsey found an increase in mitogenic activity of mouse hepatocytes [12]. Natarajan published  
248 genotoxic effects [31] and Shckorbatov showed some changes in chromatin [32], which studies  
249 bring arguments rather in favour of a carcinogenic effect.

250 Observed tumours were mostly subcutaneous, but were also ubiquitous, which is not indicative of  
251 a specific mechanism or sensitivity of a given tissue or organ. This means that inflammatory  
252 processes or genotoxic effects should be investigated in the different target tissues where tumours  
253 appeared: connective tissue, muscle, fat, vessels, pituitary gland, lymph nodes, etc. To check if  
254 this is a general phenomenon or a strain/specie specific effect, this experiment should be repeated  
255 with other rat strains and different animal species (e.g. mice, and/or rabbits) which are usual  
256 models for human toxicology.

257 The actual corner stones of guidelines for RF exposures consider behavioral effects as the most  
258 sensitive biological endpoint that had yet been observed as a deleterious effect on health. Up to  
259 date, this decreased behavioral performance is today attributed to the temperature elevation  
260 produced in rodents or primates, consecutive to the above-mentioned dielectric absorption, only  
261 linked to the average absorbed power (rms SAR). This study shows that extremely high intensity

262 microwave pulses, around one million volts per meter (1 MV.m-1), comparable to those that have  
263 in part been used in the Gulf War, produce a clear increased incidence of cancer in exposed  
264 animals. Furthermore, it tells that even an aggressive damage such as cancer can occur without so  
265 much decreased cognitive performance, even at a level below the known thermal threshold of  
266 whole-body SAR (4W/kg). Then the peak SAR should be re-considered in the definition of  
267 guidelines.

268 The original hypothesis was: is there an effect of high-power microwaves? In which conditions?  
269 If yes, does it obey to a classical thermal mechanism or a mechanism other than thermal? This  
270 study showed: i) few behavioural effects from either acute or repeated exposure; ii) an  
271 inflammatory effect of acute exposure to HPM; and iii) a surprising increase of lethal cutaneous  
272 or subcutaneous tumour incidence of sarcoma or fibrosarcoma type, in the repetitively exposed  
273 group (46% versus 8% in the sham-control group). This increased cancer incidence was associated  
274 with decreased lifespan in rats exposed to HPM with an average SAR level below the thermal  
275 threshold of 4 W kg<sup>-1</sup>. Furthermore, this effect was not associated with clear effects on behaviour,  
276 as could have been expected from previous knowledge. The underlying mechanisms are likely to  
277 be different from thermal effects and need to be further explored. Also, the thresholds or dose-  
278 responses in SAR level, duration and number of exposure sessions need to be defined.

## 279 **ACKNOWLEDGMENTS**

280 We thank A. Braun for review and editing the paper. As the following contributors could not be  
281 contacted for formal approval of the paper, they are acknowledged for their active participation to  
282 this work: E. Bourrel: technician, project administrator and investigator of the second half of

283 experiments; L. Caplier: investigator for tissue preparation and anatomopathological analyses;  
284 I. Guimiot: supervising and performing immunohistochemical analyses for GFAP, analyses of  
285 behavioral studies; O. Dupont: animal technician, housing and care of animals.

## 286 **References**

- 287 1. D'Andrea J (1999) Behavioral evaluation of microwave irradiation. *Bioelectromagnetics Suppl*  
288 4: 64-74.
- 289 2. Lu S, Brown D, Johnson C, Mathur S, Elson E (1992) Abnormal cardiovascular responses  
290 induced by localized high power microwave exposure. *IEEE Trans Biomed Eng* 39: 484-  
291 492.
- 292 3. Pakhomov A, Mathur S, Doyle J, Stuck B, Kiel J, et al. (2000) Comparative effects of extremely  
293 high power microwave pulses and a brief CW irradiation on pacemaker function in isolated  
294 frog heart slices. *Bioelectromagnetics* 21: 245-254.
- 295 4. Elder J (2003) Ocular Effects of Radiofrequency Energy. *Bioelectromagnetics Supplement 6*:  
296 S148-S161.
- 297 5. Elder J, Chou C (2003) Auditory Response to Pulsed Radiofrequency Energy.  
298 *Bioelectromagnetics Supplement 6*: S162-S173.
- 299 6. Lin J, Lin M (1980) Studies on microwave and blood-brain barrier interaction.  
300 *Bioelectromagnetics* 1: 313-323.
- 301 7. Goldman H, Lin JC, Murphy S, Lin MF (1984) Cerebrovascular permeability to <sup>86</sup>Rb in the rat  
302 after exposure to pulsed microwaves. *Bioelectromagnetics* 5: 323-330.
- 303 8. Lai H, Singh N (1997) Melatonin and a spin-trap compound block radiofrequency  
304 electromagnetic radiation-induced DNA strand breaks in rat brain cells.  
305 *Bioelectromagnetics* 18: 445-454.
- 306 9. Chemeris N, Gapeyev A, Sirota N, Gudkova O, Kornienko N, et al. (2004) DNA damage in frog  
307 erythrocytes after in vitro exposure to a high peak-power pulsed electromagnetic field.  
308 *Mutat Res* 558: 163-176.
- 309 10. Devyatkov N, Pletnyov S, Betskii O, Faikin V (2001) Effect of low-energy and high-peak-  
310 power nanosecond pulses of microwave radiation on malignant tumors. *Crit Rev Biomed*  
311 *Eng* 29: 98-110.
- 312 11. Elder J (2003) Survival and Cancer in Laboratory Mammals Exposed to Radiofrequency  
313 Energy. *Bioelectromagnetics Supplement 6*: S101-S106.
- 314 12. Dorsey WC, Ford BD, Roane L, Haynie DT, Tchounwou PB (2005) Induced mitogenic activity  
315 in AML-12 mouse hepatocytes exposed to low-dose ultra-wideband electromagnetic  
316 radiation. *Int J Environ Res Public Health* 2: 24-30.

- 317 13. Pakhomov A, Gajsek P, Allen L, Stuck B, Murphy M (2002) Comparison of dose dependences  
318 for bioeffects of continuous-wave and high-peak power microwave emissions using gel-  
319 suspended cell cultures. *Bioelectromagnetics* 23: 158-167.
- 320 14. Zhang M, Xiong ZA, Chen WJ, Yao CG, Zhao ZY, et al. (2013) Intense picosecond pulsed  
321 electric fields inhibit proliferation and induce apoptosis of HeLa cells. *Mol Med Rep* 7:  
322 1938-1944.
- 323 15. Seaman RL (2007) Effects of exposure of animals to ultra-wideband pulses. *Health Phys* 92:  
324 629-634.
- 325 16. Schunck T, Bieth F, Pinguet S, Delmote P (2016) Penetration and propagation into biological  
326 matter and biological effects of high-power ultra-wideband pulses: a review. *Electromagn  
327 Biol Med* 35: 84-101.
- 328 17. Gandhi OP (1975) Conditions of strongest electromagnetic power deposition in man and  
329 animals. *IEEE Trans MTT* 23: 1021-1029.
- 330 18. Durney CH, Massoudi H, Iskander MF (1986) In: Brooks Air Force Base TRRD, editor.  
331 Radiofrequency radiation dosimetry handbook. pp. 151-166.
- 332 19. ICNIRP (1998) Guidelines for limiting exposure to time-varying electric, magnetic, and  
333 electromagnetic fields (up to 300GHz). *Health Phys* 74 494-522.
- 334 20. Preece A, Iwi G, Davies-Smith A, Wesnes K, Butler S, et al. (1999) Effect of a 915-MHz  
335 simulated mobile phone signal on cognitive function in man. *International Journal of  
336 Radiation Biology* 75: 447-456.
- 337 21. Ammari M, Gamez C, Lecomte A, Sakly M, Abdelmelek H, et al. (2010) GFAP expression in  
338 the rat brain following sub-chronic exposure to a 900 MHz electromagnetic field signal.  
339 *International Journal of Radiation Biology* 86: 367-375.
- 340 22. Petzold A (2015) Glial fibrillary acidic protein is a body fluid biomarker for glial pathology in  
341 human disease. *Brain Res* 1600: 17-31.
- 342 23. He Y, Zhang S, Zhang H (2017) Pathologic changes of spontaneous tumors in Sprague-Dawley  
343 and Wistar rats. *Zhonghua Bing Li Xue Za Zhi* 46: 249-254.
- 344 24. Szmigielski S, Szudzinski A, Pietraszek A, Bielec M, Janiak M, et al. (1982) Accelerated  
345 Development of Spontaneous and Benzopyrene-Induced Skin Cancer in Mice Exposed to  
346 2450-MHz Microwave Radiation. *Bioelectromagnetics* 3: 179-191.
- 347 25. Chou CK, Guy AW, Kunz LL, Johnson RB, Crowley JJ, et al. (1992) Long-term, low-level  
348 microwave irradiation of rats. *Bioelectromagnetics* 13: 469-496.
- 349 26. NTP (2018) Technical report on the toxicology and carcinogenesis studies in Hsd:Sprague  
350 Dawley SD rats exposed to whole-body radio frequency radiation at a frequency (900  
351 MHz) and modulations (GSM and CDMA) used by cell phones - TR 595. NIEHS.
- 352 27. Prausnitz S, Susskind C (1962) Effects of chronic microwave irradiation on mice. *IRE Trans  
353 Biomed Electron* 9: 104-108.

- 354 28. Liddle C, Putnam J, Huey O (1994) Alteration of lifespan of mice chronically exposed to 2.45  
355 GHz microwaves. *Bioelectromagnetics* 15: 177-181.
- 356 29. Tinkey PT, Lembo TM, Evans GR, Cundiff JH, Gray KN, et al. (1998) Postirradiation  
357 sarcomas in Sprague-Dawley rats. *Radiat Res* 149: 401-404.
- 358 30. Zharkova L, Romanchenko I, Bolshakov M, Rostov V (2017) Mitochondrial respiration  
359 inhibition after exposure to UWB pulses as a possible mechanism of antitumor action. In:  
360 Series JoPC, editor. *International Conference on Recent Trends in Physics 2016*: IOP  
361 Publishing. pp. 012010.
- 362 31. Natarajan M, Nayak BK, Galindo C, Mathur SP, Roldan FN, et al. (2006) Nuclear translocation  
363 and DNA-binding activity of NF $\kappa$ B (NF-kappaB) after exposure of human monocytes to  
364 pulsed ultra-wideband electromagnetic fields (1 kV/cm) fails to transactivate kappaB-  
365 dependent gene expression. *Radiat Res* 165: 645-654.
- 366 32. Shckorbatov Y, Pasiuga V, Kolchigin N, Batrakov D, Kazansky O, et al. (2009) Changes in  
367 the human nuclear chromatin induced by ultra wideband pulse irradiation. *Central*  
368 *European Journal of Biology* 4: 97-106.

369

370 **Supporting information includes:**

371 • S1 Figure

372 • S1 to S5 Tables

373 Complete anatomopathological examinations are also available in French (83 and 93 pages, resp.,  
374 for sham and exposed rats).

375 **S1 Fig.** Avoidance test during SRS exposure: time% spent in the shielding box in habituation and  
376 exposure periods.

377 **S1 Table.** Rotarod test data after SRS exposure: time spent on the rods at training and at test.

378 **S2 Table.** Avoidance test during SRS exposure: time and time% spent in the shielding box in  
379 habituation and exposure periods.

380 **S3 Table.** GFAP immunohistochemical labeling after SRX exposure - raw values. Magnification

381 x10.

382 **S4 Table.** GFAP immunohistochemical labeling after SRS exposure - raw values. Magnification

383 x10.

384 **S5 Table.** Synthesis of histological lesions in sham (Sh) and exposed (Ex) groups after repeated

385 SRS exposure.

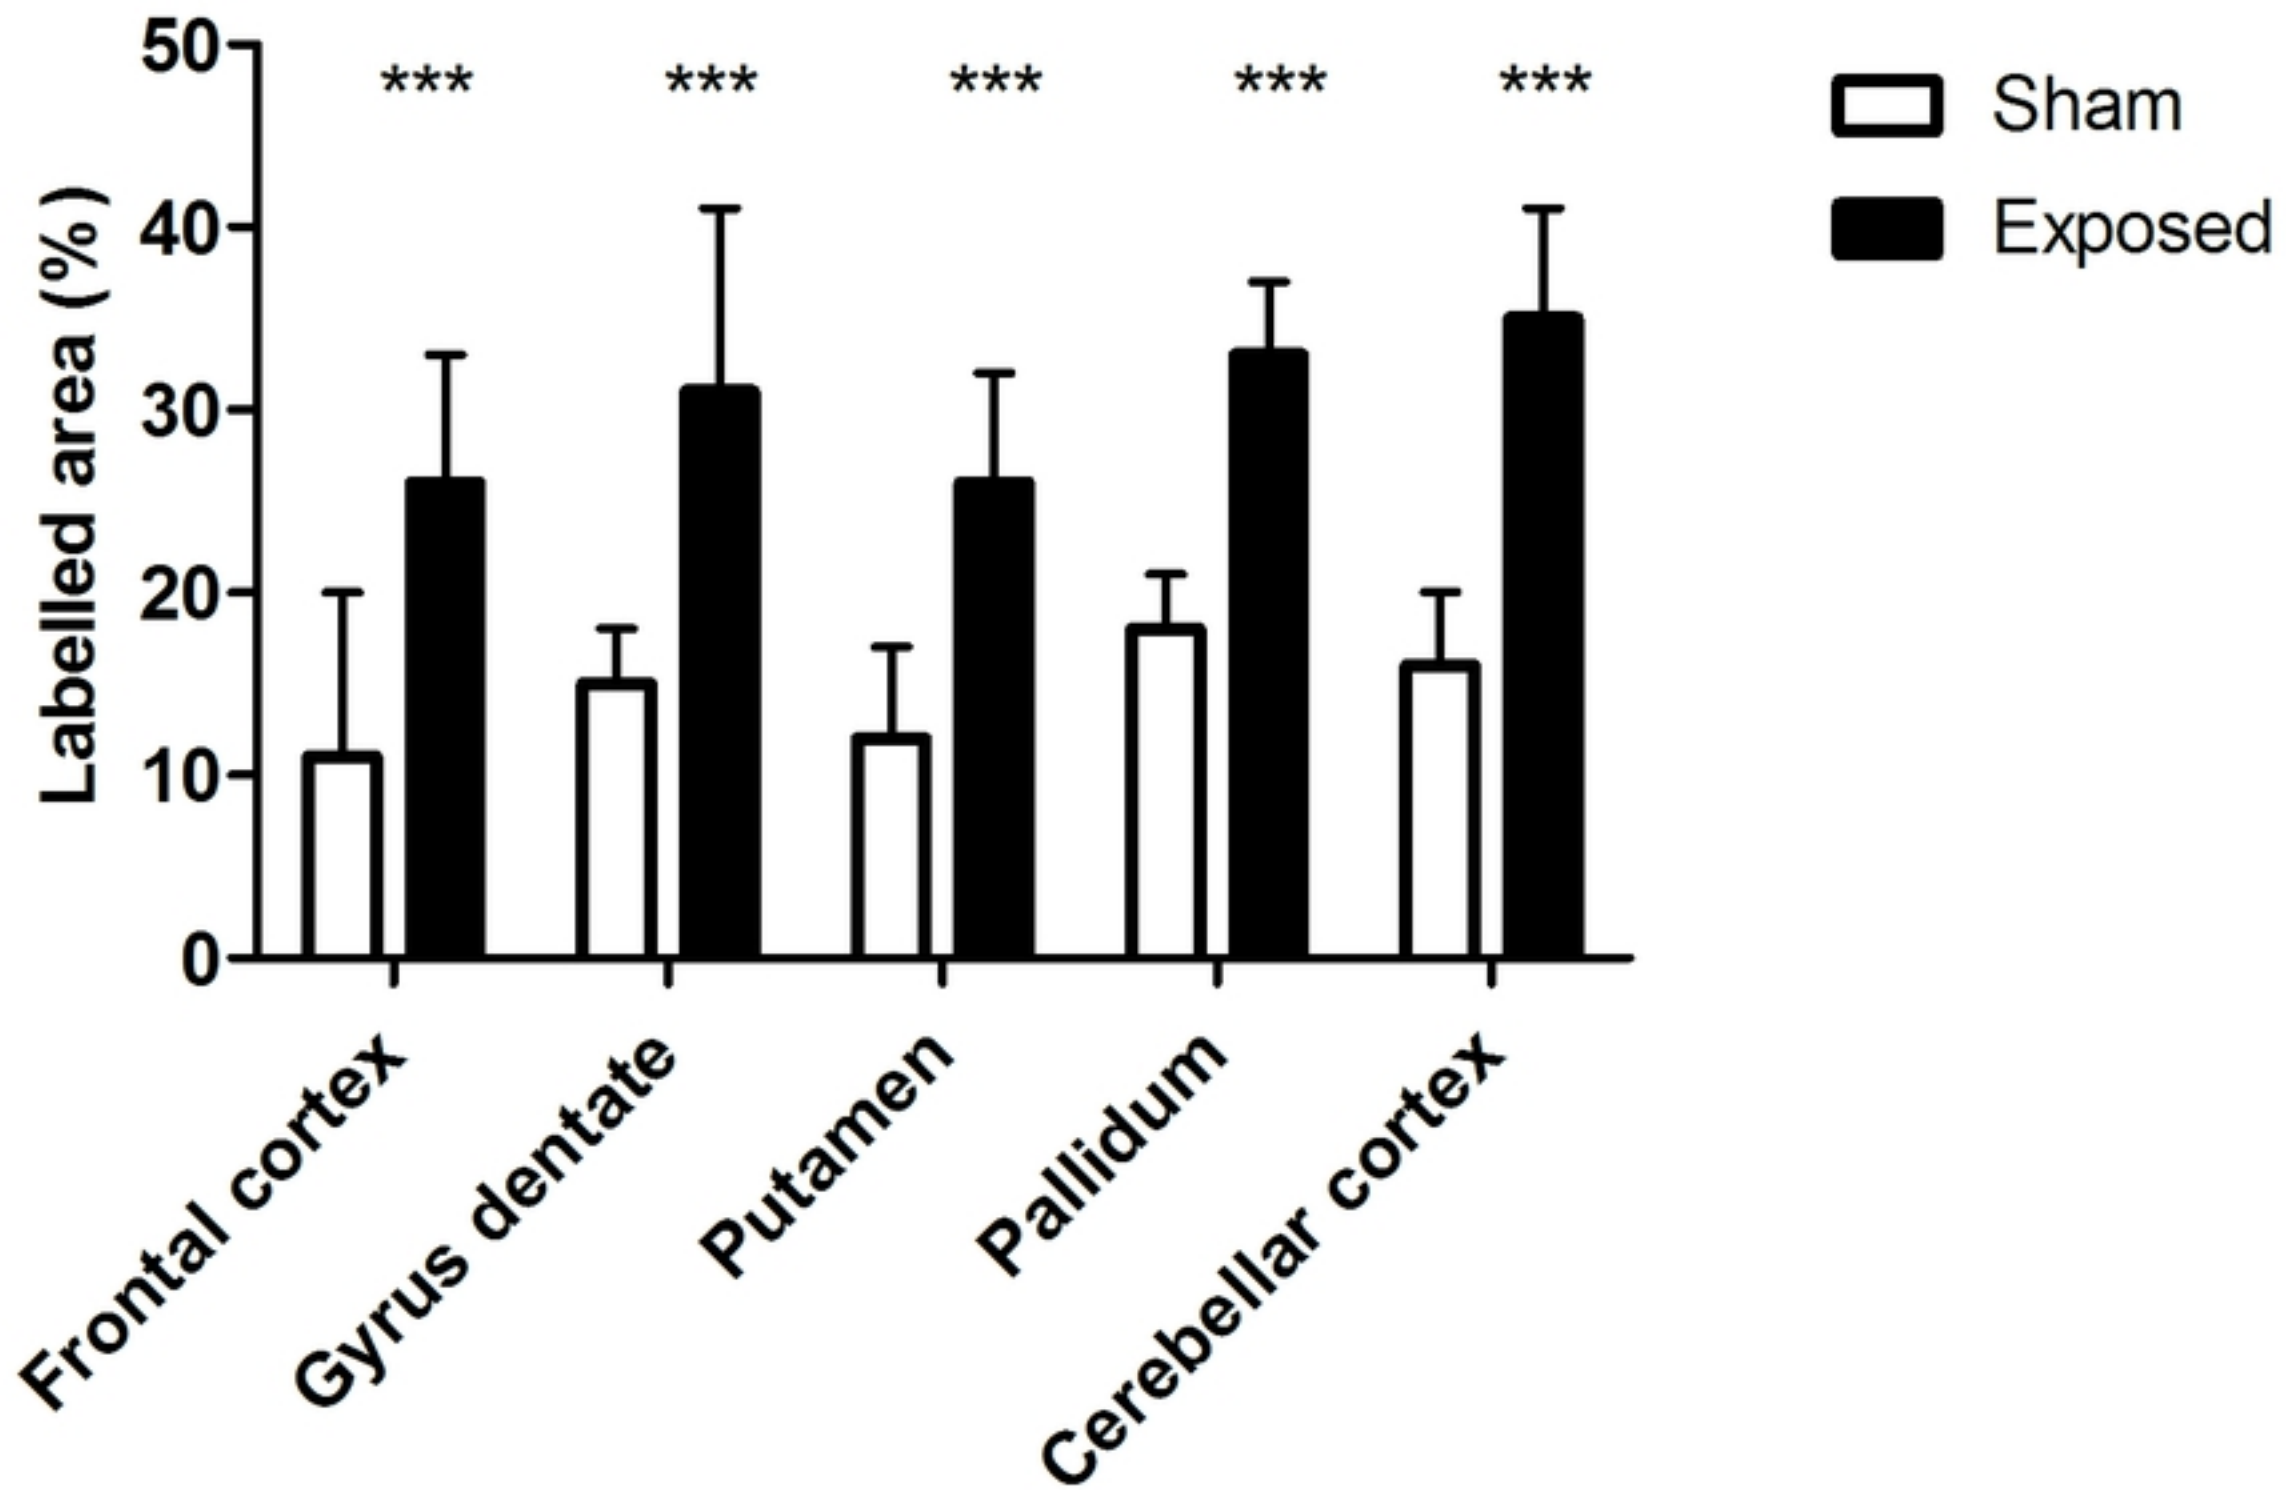

Figure 1



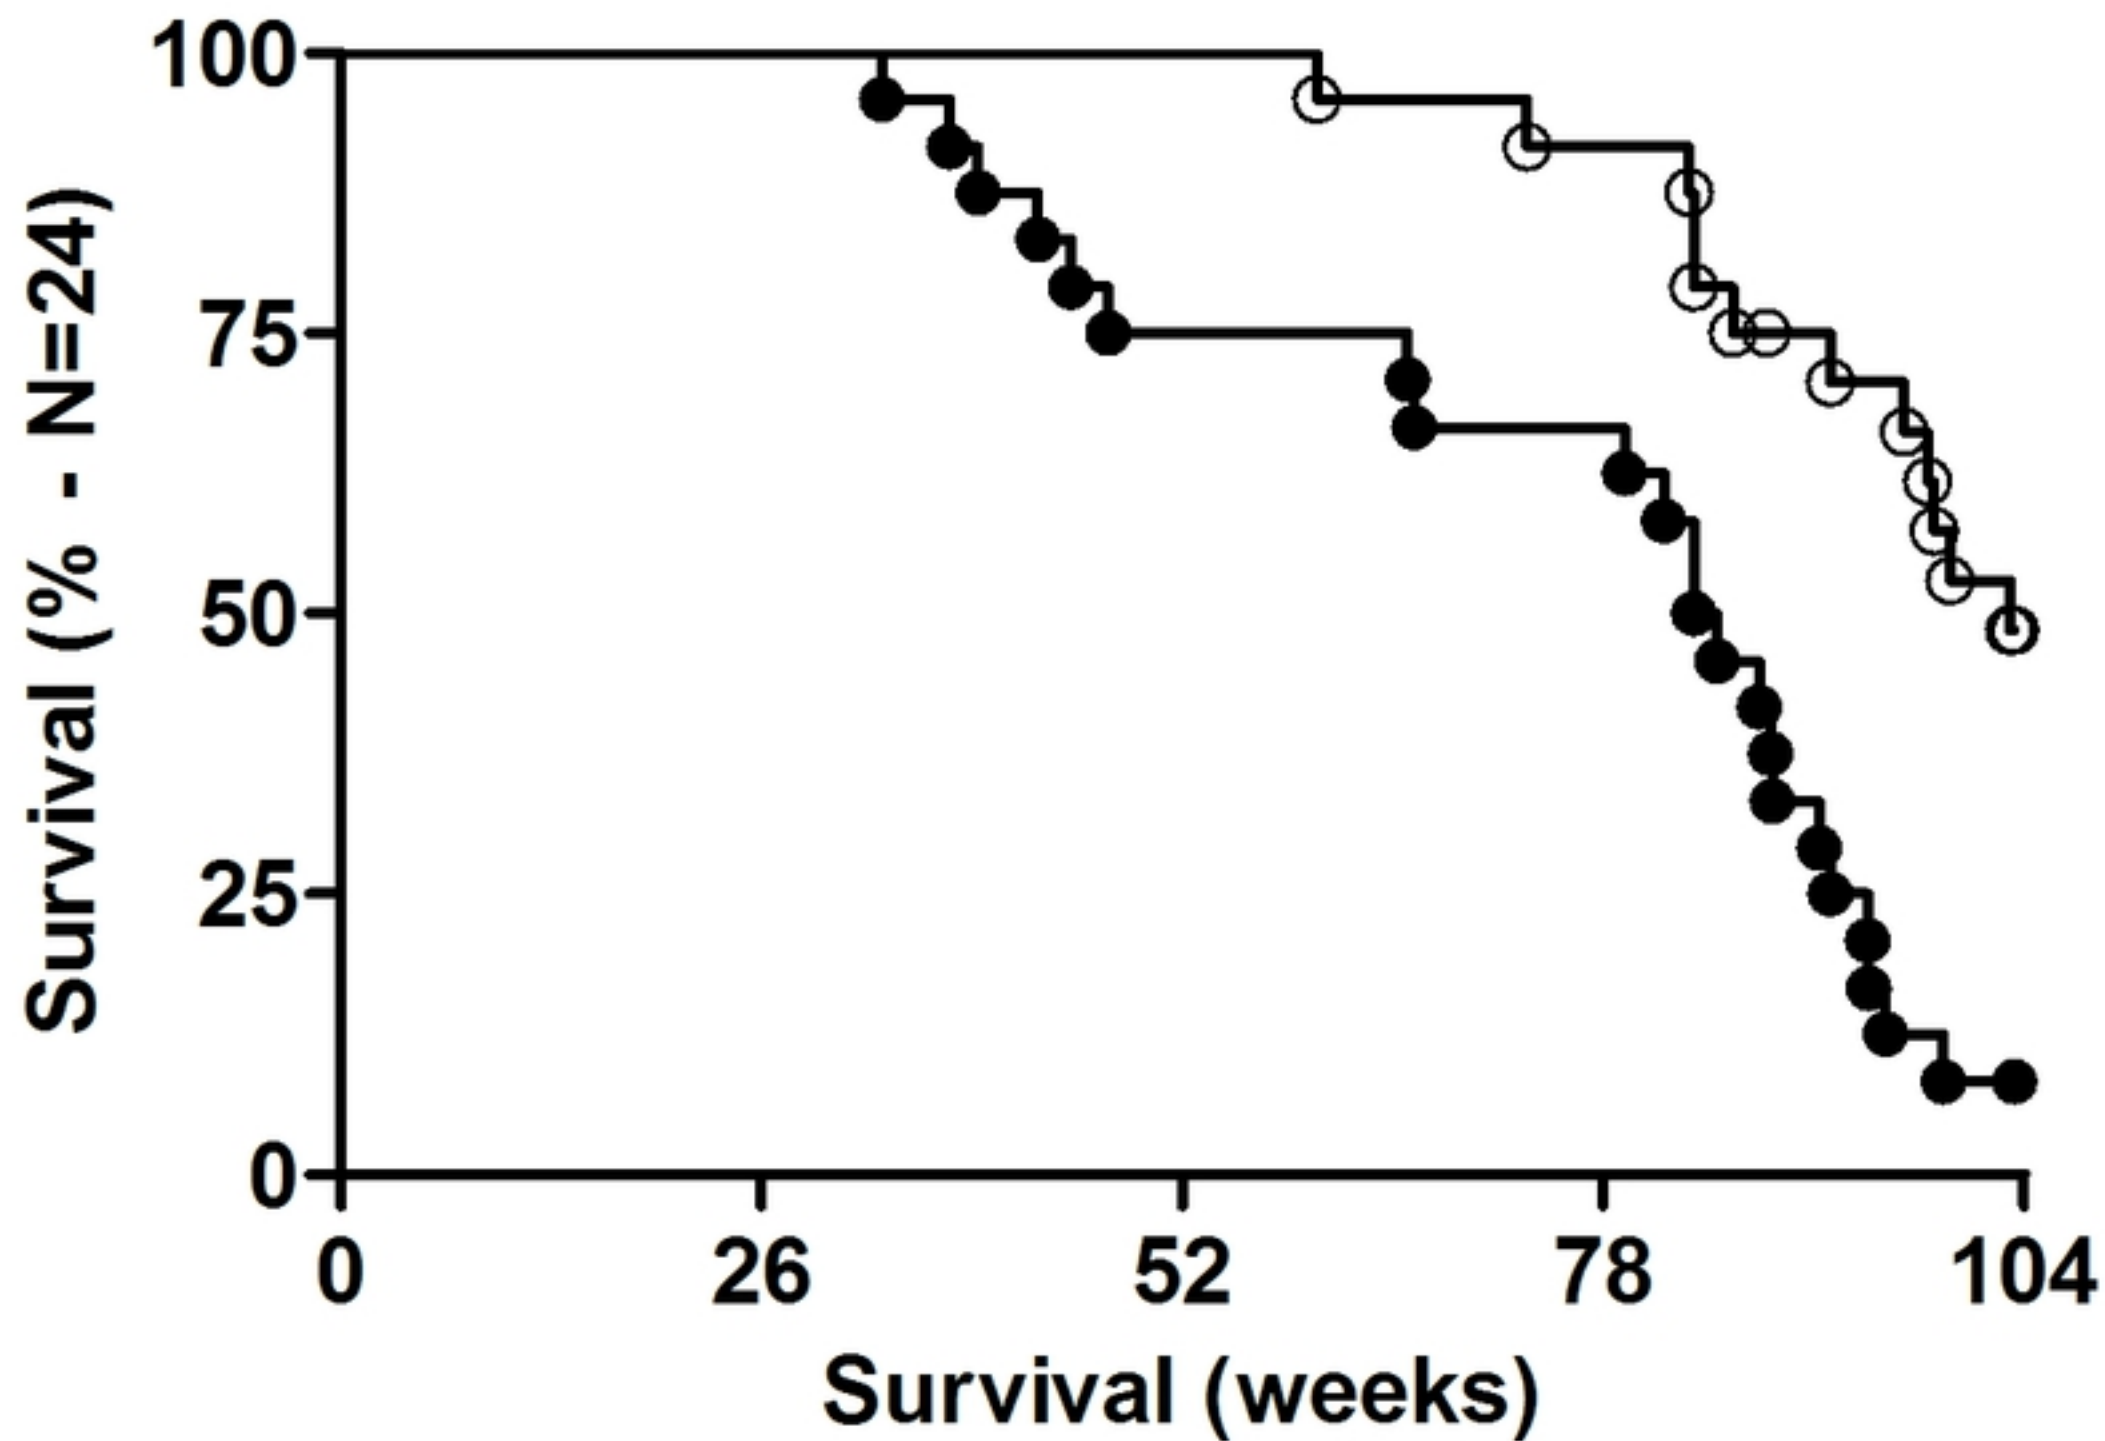

Figure 2

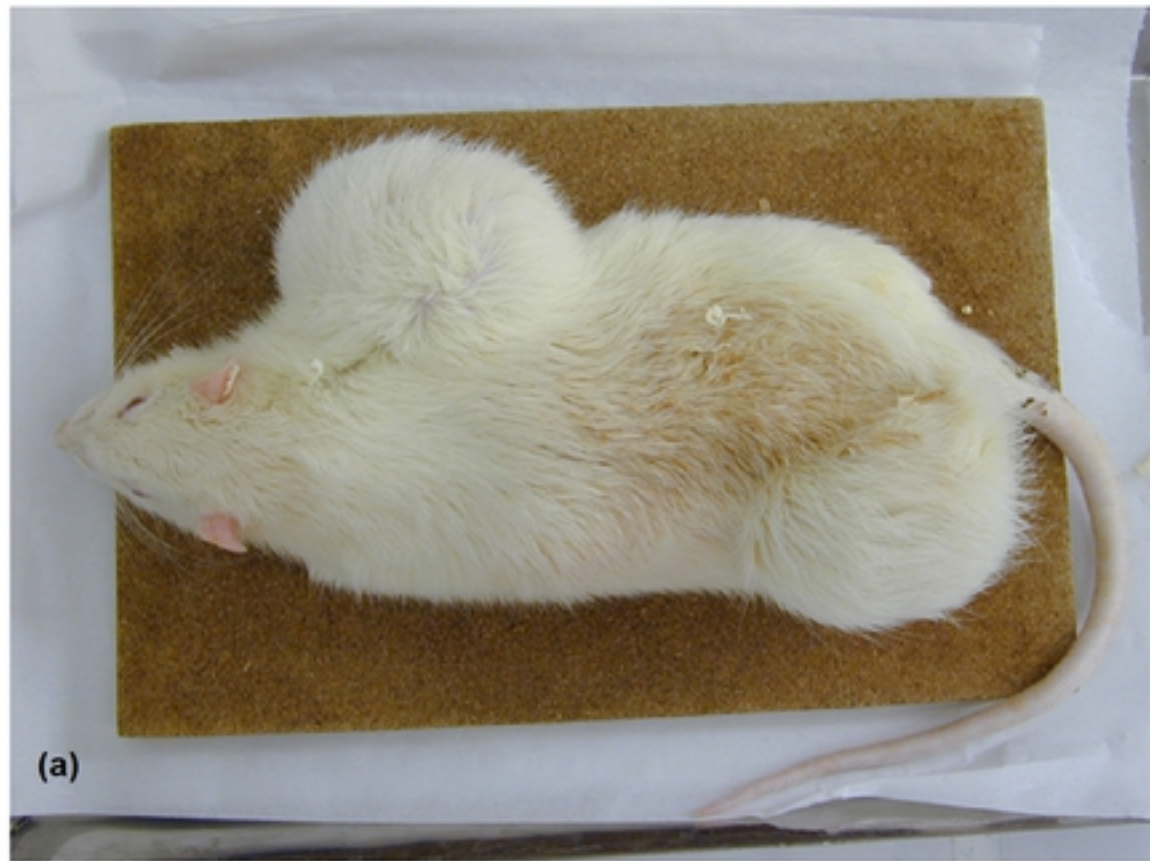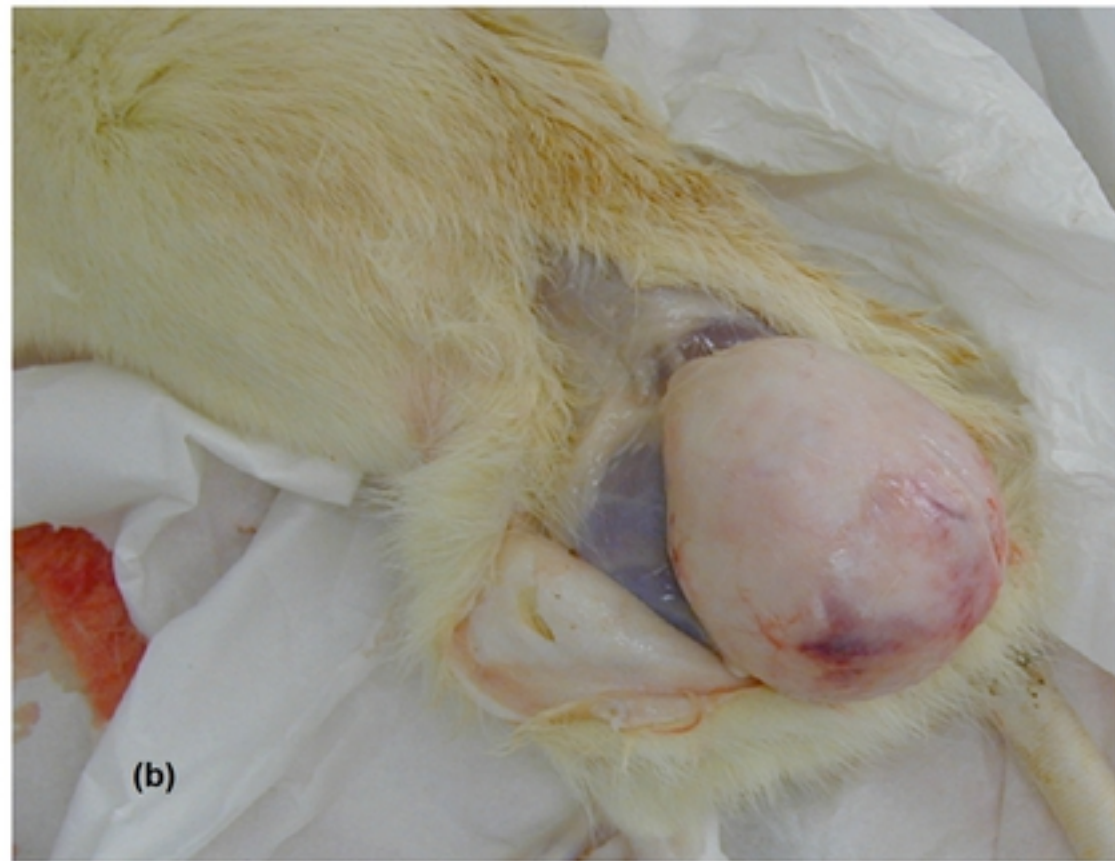

Figure 3
